# Supplementary material for: Phase-Inverted Copolymer Membrane for the Enhancement of Textile Supercapacitors
Source: MDPI journal article supplement (doi:10.3390/polym14163399), 2022-08-19
Supplement: s1 [file s1]

**Support information for**

**Phase inverted co-polymer membrane for the  
enhancement of textile supercapacitors**

**Sheng Yong, Nicholas Hillier and Stephen Paul Beeby**

**(a)**

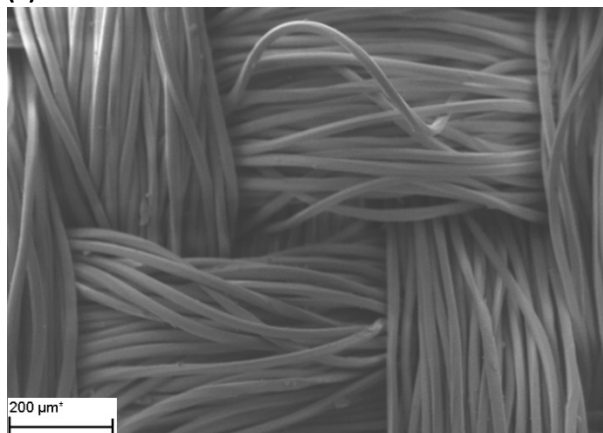

**(b)**

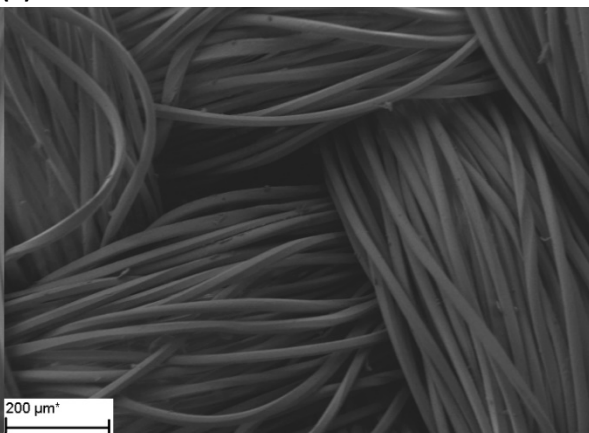

**(c)**

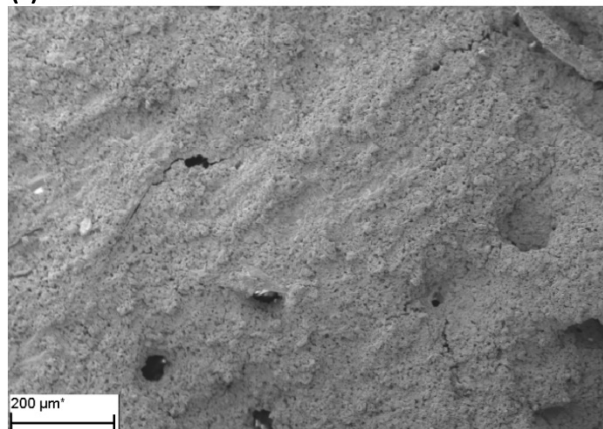

**(d)**

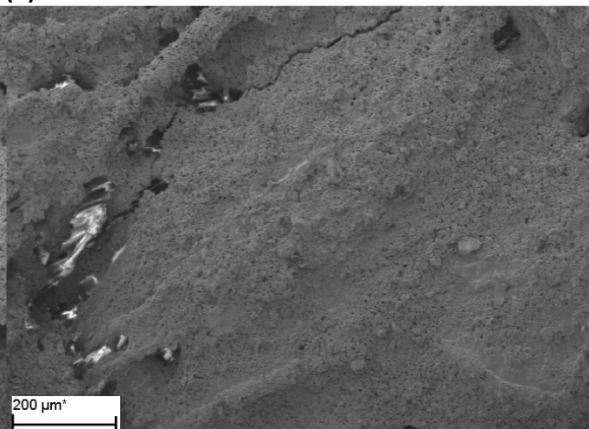

**(e)**

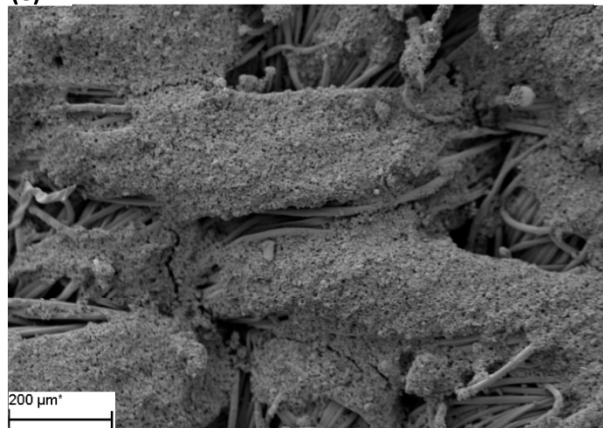

**(f)**

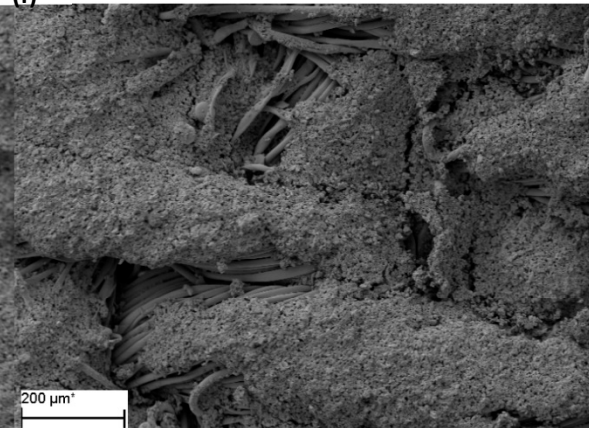

**(g)**

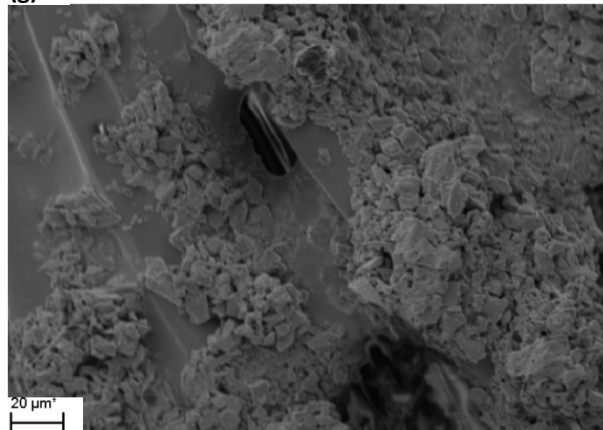

**(h)**

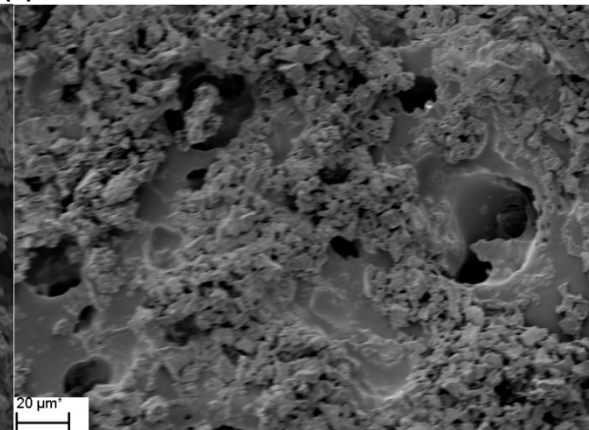

**Figure S1.** SEM photos showing plan views of (a) PC 150 textile, (b) P textile (c) PC 150 textile with membrane and carbon coating, (d) P textile with membrane and carbon coating, (e) PC 150 textile with carbon coating without membrane, (f) P textile with carbon coating without membrane (g) PC 150 textile with membrane and carbon coating (high magnification), (h) P textile with membrane and carbon coating (high magnification)

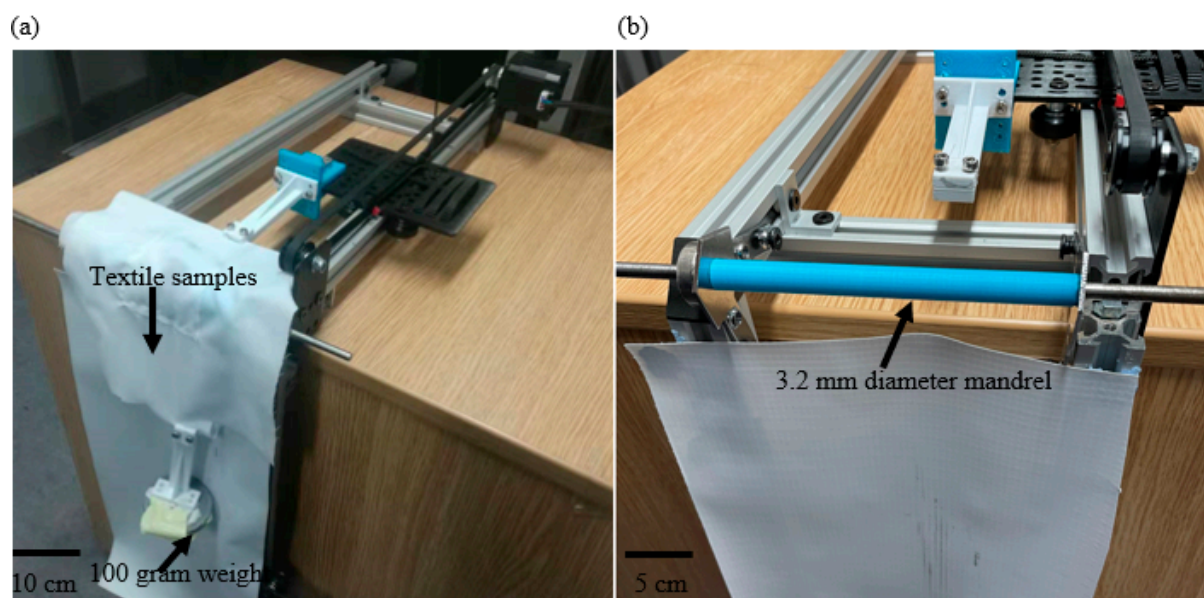

**Figure S2** (a) Bending test set up, (b) Mandrel used in bending test
